# Supplementary material
Source: PubMed Central journal article supplement (PMC10169399)
Supplement: ciac370_supplementary_data.pdf [file ciac370_supplementary_data.pdf]

# Supplementary Material

Tordoff DM, Dombrowski JC, Ramchandani MS, Barbee LA. Trans-inclusive Sexual Health Questionnaire to Improve HIV/STI Care for Transgender Patients: Anatomic-site Specific STI Prevalence & Screening Rates. *Clinical Infectious Diseases*, 2022.

## Contents

Supplementary Table 1. Trans-inclusive CASI Questions

Supplementary Table 2. Demographics characteristics of TNB Participants

Supplementary Table 3. Mean annual number of patient visits

Supplementary Table 4. Response patterns to questions of current anatomy and history of gender-affirming genital surgeries among transgender and non-binary patients

Supplementary Table 5. Proportion of TNB patients who did not response to questions about current anatomy, gender-affirming genital surgeries, and current hormones use (data for Figure 1)

Supplementary Table 6. Figure 2. HIV/STI positivity among transgender and non-binary patients attending the sexual health clinic in Seattle, WA, May 2016 – February 2020 (N=871) (data for Figure 2)

**Supplementary Table 1. Trans-inclusive CASI Questions**

| Measure                                              | Question                                                                                                                                    | Response Options                                                                                                                                                                                                                                                                                                                                                                                                                                                                 | Data Collection |                |
|------------------------------------------------------|---------------------------------------------------------------------------------------------------------------------------------------------|----------------------------------------------------------------------------------------------------------------------------------------------------------------------------------------------------------------------------------------------------------------------------------------------------------------------------------------------------------------------------------------------------------------------------------------------------------------------------------|-----------------|----------------|
|                                                      |                                                                                                                                             |                                                                                                                                                                                                                                                                                                                                                                                                                                                                                  | 5/2016-12/2018  | 12/2018-2/2020 |
| <b>Gender</b>                                        | What is your gender? (select one)                                                                                                           | <ul style="list-style-type: none"> <li>• Male</li> <li>• Female</li> <li>• Transgender Woman/Transfeminine</li> <li>• Transgender Man/Transmasculine</li> <li>• Non-binary/Genderqueer</li> <li>• Not listed, please specify: (write-in)</li> </ul>                                                                                                                                                                                                                              | Yes             | Yes            |
| <b>Sex Assigned at Birth</b>                         | What sex was recorded on your original birth certificate? (select one)                                                                      | <ul style="list-style-type: none"> <li>• Male</li> <li>• Female</li> </ul>                                                                                                                                                                                                                                                                                                                                                                                                       | Yes             | Yes            |
| <b>Pronoun(s)</b>                                    | Which pronouns do you use? (select one)                                                                                                     | <ul style="list-style-type: none"> <li>• He/him</li> <li>• She/her</li> <li>• They/them</li> <li>• Not listed, please specify: (write-in)</li> </ul>                                                                                                                                                                                                                                                                                                                             | Yes             | Yes            |
| <b>Current Anatomy</b>                               | So that we may best serve you today, please tell us about your current anatomy. Which of the following do you have? (select all that apply) | <ul style="list-style-type: none"> <li>• Vagina/Front hole</li> <li>• Cervix</li> <li>• Uterus</li> <li>• Ovaries/Adnexa</li> <li>• Penis/Phallus</li> <li>• Testes/Scrotum</li> <li>• Prostate</li> <li>• I prefer to discuss my anatomy with my clinician</li> </ul>                                                                                                                                                                                                           | No              | Yes            |
| <b>History of Gender-Affirming Genital Surgeries</b> | Some surgical procedures impact which STDs a person can get. Have you had any of the following? (select all that apply)                     | <ul style="list-style-type: none"> <li>• I had a hysterectomy</li> <li>• I had an oophorectomy</li> <li>• I had a vaginectomy</li> <li>• I had a penectomy</li> <li>• I had an orchiectomy</li> <li>• I had a vaginoplasty via penile inversion</li> <li>• I had a vaginoplasty via colonic graft</li> <li>• I had a metoidioplasty</li> <li>• I had a phalloplasty</li> <li>• I had a scrotoplasty</li> <li>• Not listed, please specify: (write-in)</li> <li>• None</li> </ul> | No              | Yes            |
| <b>Hormone Use</b>                                   | Are you currently taking any hormone medications? (select one)                                                                              | <ul style="list-style-type: none"> <li>• Yes</li> <li>• No</li> <li>• I don't know</li> </ul>                                                                                                                                                                                                                                                                                                                                                                                    | No              | Yes            |
| <b>Hormone Use</b>                                   | Which hormones are you taking? (select all that apply)                                                                                      | <ul style="list-style-type: none"> <li>• Testosterone</li> <li>• Estrogen</li> <li>• Progesterone</li> <li>• Anti-androgens</li> <li>• Not listed, please specify: (write-in)</li> </ul>                                                                                                                                                                                                                                                                                         | No              | Yes            |
| <b>Symptoms</b>                                      | Are you having any of these symptoms today? (select all that apply)                                                                         | <p><i>[if patient was assigned male at birth, reported having a phalloplasty or metoidioplasty, or reported having a penis/phallus:]</i></p> <ul style="list-style-type: none"> <li>• Discharge (fluid or drip) from your penis</li> <li>• Discomfort or pain when you urinate (pee)</li> </ul>                                                                                                                                                                                  | No              | Yes            |

- Discomfort or itching at the tip of your penis
- Sores, bumps or rashes on the genitals
- Body rash
- Pain, discomfort or discharge from your anus (butt)
- Pain or discomfort in your testicles (balls)
- Sore throat
- I don't have any of these

*[if patient was assigned female at birth, reported having a vaginoplasty, or reported having a vagina:]*

- Abnormal vaginal discharge
- Abnormal vaginal odor
- Vaginal discomfort or itching
- Urinating (peeing) more often than usual
- Pain or burning when you urinate (pee)
- Abdominal (stomach) pain or cramping
- Pain with sex or after sex
- Abnormal vaginal bleeding (bleeding in between your periods or bleeding after sex)
- Sores, bumps or rashes on the genitals
- Body rash
- Pain or discharge from your anus (butt)
- Sore throat
- I don't have any of these

*Note: patients could potentially be asked both sets of questions about STI symptoms depending on the anatomy/surgeries they reported*

|                               |                                                                                                                                                                                                                                                                                   |                                                                                                                                                                                                                                                                                                                                                                                                                                                                                                               |    |     |
|-------------------------------|-----------------------------------------------------------------------------------------------------------------------------------------------------------------------------------------------------------------------------------------------------------------------------------|---------------------------------------------------------------------------------------------------------------------------------------------------------------------------------------------------------------------------------------------------------------------------------------------------------------------------------------------------------------------------------------------------------------------------------------------------------------------------------------------------------------|----|-----|
| <b>Gender of Sex Partners</b> | In the past year, who have you had sex with? Sex refers to oral, anal or vaginal sex. (select all that apply)                                                                                                                                                                     | <ul style="list-style-type: none"> <li>• Men</li> <li>• Women</li> <li>• Trans Men</li> <li>• Trans Women</li> <li>• Non-binary/genderqueer</li> <li>• Someone else: (write-in)</li> <li>• I did not have sex in the past year</li> </ul>                                                                                                                                                                                                                                                                     | No | Yes |
| <b>Sexual Behavior</b>        | Please note that we know individuals use various terminology for their body parts and the type of sex they have. In order to be approachable to everyone, we are using clinical terminology.<br><br>What kinds of sex have you had in the past 12 months? (select all that apply) | <ul style="list-style-type: none"> <li>• Received oral sex (partner's mouth on my genitals)</li> <li>• Given oral sex (my mouth on partner's genitals)</li> <li>• Oral-anal sex (my mouth on partner's anus/butt)</li> <li>• Anal-oral sex (partner's mouth on my anus/butt)</li> <li>• Receptive anal sex (partner's penis in my anus/butt)</li> <li>• Insertive anal sex (my penis in partner's anus/butt)</li> <li>• Receptive vaginal/front hole sex (partner's penis in my vagina/front hole)</li> </ul> | No | Yes |

- 
- Insertive vaginal/front hole sex (my penis in partner's vagina/front hole)
  - Not listed, please specify: (write-in)
-

**Supplementary Table 2. Demographics Characteristics of TNB Participants**

| Characteristics                                                      | Total      | Period of Data Collection |                | p-value |
|----------------------------------------------------------------------|------------|---------------------------|----------------|---------|
|                                                                      |            | 5/2016-12/2018            | 12/2018-2/2020 |         |
| N visits                                                             | 826        | 489                       | 337            |         |
| Age, mean (sd)                                                       | 29.9 (7.6) | 29.8 (7.4)                | 30.0 (7.7)     | 0.766   |
| Gender, N (%)                                                        |            |                           |                |         |
| Non-binary AMAB                                                      | 337 (40.8) | 203 (41.5)                | 134 (39.8)     | 0.396   |
| Non-binary AFAB                                                      | 146 (17.7) | 83 (17.0)                 | 63 (18.7)      |         |
| Transgender Women                                                    | 195 (23.6) | 110 (22.5)                | 85 (25.2)      |         |
| Transgender Men                                                      | 105 (12.7) | 62 (12.7)                 | 43 (12.8)      |         |
| Gender not listed                                                    | 43 (5.2)   | 31 (6.3)                  | 12 (3.6)       |         |
| Race, N (%)                                                          |            |                           |                |         |
| Asian                                                                | 87 (10.5)  | 61 (12.5)                 | 26 (7.7)       | 0.287   |
| Black                                                                | 79 (9.6)   | 47 (9.6)                  | 32 (9.5)       |         |
| Native American/Alaska Native                                        | 15 (1.8)   | 7 (1.4)                   | 8 (2.4)        |         |
| Native Hawaiian/Pacific Islander                                     | 4 (0.5)    | 2 (0.4)                   | 2 (0.6)        |         |
| White                                                                | 519 (62.8) | 295 (60.3)                | 224 (66.5)     |         |
| Multiracial                                                          | 35 (4.2)   | 22 (4.5)                  | 13 (3.9)       |         |
| Unknown/Refused                                                      | 87 (10.5)  | 55 (11.2)                 | 32 (9.5)       |         |
| Ethnicity, N (%)                                                     |            |                           |                |         |
| Hispanic/Latinx                                                      | 113 (13.7) | 60 (12.3)                 | 53 (15.7)      | 0.065   |
| Non-Hispanic/Latinx                                                  | 677 (82.0) | 402 (82.2)                | 275 (81.6)     |         |
| Unknown/Refused                                                      | 36 (4.4)   | 27 (5.5)                  | 9 (2.7)        |         |
| Sexual Orientation                                                   |            |                           |                |         |
| Bisexual                                                             | 67 (8.4)   | 47 (10.1)                 | 20 (6.0)       | <0.001  |
| Gay                                                                  | 133 (16.7) | 77 (16.6)                 | 56 (16.9)      |         |
| Lesbian                                                              | 10 (1.3)   | 0 (0.0)                   | 10 (3.0)       |         |
| Pansexual                                                            | 45 (5.7)   | 0 (0.0)                   | 45 (13.6)      |         |
| Queer                                                                | 386 (48.6) | 240 (51.7)                | 146 (44.1)     |         |
| Straight                                                             | 98 (12.3)  | 53 (11.4)                 | 45 (13.6)      |         |
| Unknown/Refused                                                      | 56 (7.0)   | 47 (10.1)                 | 9 (2.7)        |         |
| Reason for Seeking Care <sup>1</sup>                                 |            |                           |                |         |
| I have symptoms                                                      |            |                           | 83 (24.6)      |         |
| I tested positive for an STD and need treatment                      |            |                           | 12 (3.6)       |         |
| My sex partner was recently diagnosed with or has symptoms of an STD |            |                           | 59 (17.5)      |         |
| I tested positive for HIV                                            |            |                           | 2 (0.6)        |         |
| Someone from the Health Department called me                         |            |                           | 4 (1.2)        |         |
| I want to be tested for HIV                                          |            |                           | 137 (40.7)     |         |
| I want to be tested for STDs                                         |            |                           | 198 (58.8)     |         |
| I want to start PrEP                                                 |            |                           | 25 (7.4)       |         |
| PrEP follow-up appointment                                           |            |                           | 73 (21.7)      |         |
| I want an IUD or implant/Nexplanon                                   |            |                           | 4 (1.2)        |         |
| I want emergency contraception (Plan B)                              |            |                           | 1 (0.3)        |         |
| I was referred from another clinic or doctor                         |            |                           | 13 (3.9)       |         |

<sup>1</sup> These data were only collected during the latter study period. Patients could select multiple reasons for seeking care.

---

**Supplementary Table 3. Mean Annual Number of Patient Visits**

---

| <b>Period of Data Collection</b>       | <b>TNB patient visits</b> | <b>Cisgender patient visits</b> |
|----------------------------------------|---------------------------|---------------------------------|
| <b>5/2016-12/2018</b>                  |                           |                                 |
| Days (Years)                           | 958 (2.62)                | 958 (2.62)                      |
| Number of Visits, n (%)                | 489 (2.5%)                | 19446 (97.5%)                   |
| Mean Annual Number of Visits           | 188.6                     | 7409.0                          |
| <b>12/2018-2/2020</b>                  |                           |                                 |
| Days (Years)                           | 435 (1.19)                | 435 (1.19)                      |
| Number of Visits, n (%)                | 337 (3.2%)                | 10319 (96.8%)                   |
| Mean Annual Number of Visits           | 282.8                     | 8658.5                          |
| <b>Percentage Change</b>               | <b>49.9%</b>              | <b>16.9%</b>                    |
| <b>Difference in Percentage Change</b> | <b>33.0%</b>              |                                 |

---

**Supplementary Table 4. Response patterns to questions of current anatomy and history of gender-affirming genital surgeries among transgender and non-binary patients**

| Sex assigned at birth                  | Response to check-all-that-apply current anatomy question | Patients who reported having |                     | No response to surgery question |
|----------------------------------------|-----------------------------------------------------------|------------------------------|---------------------|---------------------------------|
|                                        |                                                           | No surgeries                 | 1 or more surgeries |                                 |
| <b>Total, N</b>                        |                                                           | <b>258 (76.6)</b>            | <b>16 (4.7)</b>     | <b>63 (18.7)</b>                |
| <b>Assigned male at birth, N (%)</b>   |                                                           | <b>187 (81.3)</b>            | <b>3 (1.3)</b>      | <b>40 (17.4)</b>                |
|                                        | penis/phallus, testes/scrotum, prostate                   | 107 (57.2)                   | 3 (100.0)           | 22 (55.0)                       |
|                                        | penis/phallus                                             | 36 (19.3)                    |                     | 6 (15.0)                        |
|                                        | penis/phallus, testes/scrotum                             | 20 (10.7)                    |                     | 3 (7.5)                         |
|                                        | penis/phallus, prostate                                   | 2 (1.1)                      |                     |                                 |
|                                        | testes/scrotum, prostate                                  | 2 (1.1)                      |                     |                                 |
|                                        | testes/scrotum                                            | 2 (1.1)                      |                     |                                 |
|                                        | vagina/front hole                                         | 1 (0.5)                      |                     |                                 |
|                                        | prefer to discuss with provider                           | 16 (8.6)                     |                     | 3 (7.5)                         |
|                                        | no response                                               | 1 (0.5)                      |                     | 6 (15.0)                        |
| <b>Assigned female at birth, N (%)</b> |                                                           | <b>71 (66.4)</b>             | <b>13 (12.1)</b>    | <b>23 (21.5)</b>                |
|                                        | vagina/front hole, cervix, uterus, ovaries                | 48 (67.6)                    | 1 (7.7)             | 18 (78.3)                       |
|                                        | vagina/front hole                                         | 11 (15.5)                    | 6 (46.2)            |                                 |
|                                        | vagina/front hole, cervix, uterus                         | 2 (2.8)                      |                     |                                 |
|                                        | vagina/front hole, cervix, ovaries                        | 1 (1.4)                      |                     | 1 (4.3)                         |
|                                        | vagina/front hole, uterus, ovaries                        | 2 (2.8)                      |                     | 1 (4.3)                         |
|                                        | vagina/front hole, ovaries                                |                              | 1 (7.7)             |                                 |
|                                        | penis/phallus                                             | 4 (5.6)                      |                     |                                 |
|                                        | testes/scrotum                                            |                              |                     | 1 (4.3)                         |
|                                        | prefer to discuss anatomy with provider                   | 2 (2.8)                      | 4 (30.8)            |                                 |
|                                        | no response to anatomy question                           | 1 (1.4)                      | 1 (7.7)             | 2 (8.7)                         |

**Supplementary Table 5. Proportion of TNB patients who did not respond to questions about current anatomy, gender-affirming genital surgeries, and current hormones use**

|                          | Did not respond |    |                   |
|--------------------------|-----------------|----|-------------------|
|                          | N               | n  | % (95% CI)        |
| <b>Anatomy Questions</b> |                 |    |                   |
| Non-binary AFAB          | 63              | 5  | 7.9 (1.3, 14.6)   |
| Non-binary AMAB          | 134             | 4  | 3.0 (0.1, 5.9)    |
| Transgender Men          | 43              | 4  | 9.3 (0.6, 18)     |
| Transgender Women        | 85              | 19 | 22.4 (13.5, 31.2) |
| <b>Surgery Questions</b> |                 |    |                   |
| Non-binary AFAB          | 63              | 15 | 23.8 (13.3, 34.3) |
| Non-binary AMAB          | 134             | 18 | 13.4 (7.7, 19.2)  |
| Transgender Men          | 43              | 7  | 16.3 (5.2, 27.3)  |
| Transgender Women        | 85              | 19 | 22.4 (13.5, 31.2) |
| <b>Hormone Questions</b> |                 |    |                   |
| Non-binary AFAB          | 63              | 0  | 0.0 (0.0, 0.0)    |
| Non-binary AMAB          | 134             | 1  | 0.7 (0.0, 2.2)    |
| Transgender Men          | 43              | 1  | 2.3 (0.0, 6.8)    |
| Transgender Women        | 85              | 4  | 4.7 (0.2, 9.2)    |

AMAB, assigned male at birth; AFAB, assigned female at birth; CI, confidence interval.

Non-response to the question about anatomy include both participants who indicated they preferred to discuss their anatomy with their provider and those who did not respond to the questions.



**Supplementary Table 6. Figure 2. HIV/STI positivity among transgender and non-binary patients attending the sexual health clinic in Seattle, WA, May 2016 – February 2020 (N=871)**

|                      | N Tested | Tested Positive |                  |
|----------------------|----------|-----------------|------------------|
|                      |          | n               | % (95% CI)       |
| <b>Pharyngeal GC</b> |          |                 |                  |
| Non-binary AFAB      | 59       | 0               | 0.0 (0.0, 0.0)   |
| Non-binary AMAB      | 270      | 26              | 9.6 (6.1, 13.1)  |
| Transgender Men      | 54       | 3               | 5.6 (0.0, 11.7)  |
| Transgender Women    | 131      | 9               | 6.9 (2.5, 11.2)  |
| <b>Rectal GC</b>     |          |                 |                  |
| Non-binary AFAB      | 21       | 0               | 0.0 (0.0, 0.0)   |
| Non-binary AMAB      | 245      | 35              | 14.3 (9.9, 18.7) |
| Transgender Men      | 32       | 1               | 3.1 (0.0, 9.2)   |
| Transgender Women    | 123      | 8               | 6.5 (2.1, 10.9)  |
| <b>Genital GC</b>    |          |                 |                  |
| Non-binary AFAB      | 126      | 1               | 0.8 (0.0, 2.3)   |
| Non-binary AMAB      | 107      | 13              | 12.1 (6.0, 18.3) |
| Transgender Men      | 75       | 3               | 4.0 (0.0, 8.4)   |
| Transgender Women    | 59       | 1               | 1.7 (0.0, 5)     |
| <b>Pharyngeal CT</b> |          |                 |                  |
| Non-binary AFAB      | 59       | 0               | 0.0 (0.0, 0.0)   |
| Non-binary AMAB      | 270      | 7               | 2.6 (0.7, 4.5)   |
| Transgender Men      | 54       | 2               | 3.7 (0.0, 8.7)   |
| Transgender Women    | 131      | 3               | 2.3 (0.0, 4.9)   |
| <b>Rectal CT</b>     |          |                 |                  |
| Non-binary AFAB      | 21       | 1               | 4.8 (0.0, 13.9)  |
| Non-binary AMAB      | 245      | 31              | 12.7 (8.5, 16.8) |
| Transgender Men      | 32       | 3               | 9.4 (0.0, 19.5)  |
| Transgender Women    | 123      | 12              | 9.8 (4.5, 15)    |
| <b>Genital CT</b>    |          |                 |                  |
| Non-binary AFAB      | 126      | 4               | 3.2 (0.1, 6.2)   |
| Non-binary AMAB      | 107      | 2               | 1.9 (0.0, 4.4)   |
| Transgender Men      | 75       | 2               | 2.7 (0.0, 6.3)   |
| Transgender Women    | 59       | 2               | 3.4 (0.0, 8)     |
| <b>Syphilis</b>      |          |                 |                  |
| Non-binary AFAB      | 118      | 0               | 0.0 (0.0, 0.0)   |
| Non-binary AMAB      | 270      | 21              | 7.8 (4.6, 11)    |
| Transgender Men      | 75       | 4               | 5.3 (0.2, 10.4)  |
| Transgender Women    | 155      | 14              | 9 (4.5, 13.5)    |
| <b>HIV</b>           |          |                 |                  |
| Non-binary AFAB      | 117      | 0               | 0.0 (0.0, 0.0)   |
| Non-binary AMAB      | 254      | 0               | 0.0 (0.0, 0.0)   |
| Transgender Men      | 78       | 0               | 0.0 (0.0, 0.0)   |
| Transgender Women    | 159      | 2               | 1.3 (0.0, 3)     |

AMAB, assigned male at birth; AFAB, assigned female at birth; CT, chlamydia, GC, gonorrhea
